# Supplementary material for: RNA-seq reveals Nup62 as a potential regulator for cell division after traumatic brain injury in mice hippocampus
Source: PeerJ. 2023 Mar 7;11:e14913. doi: 10.7717/peerj.14913 (PMC10000302; doi:10.7717/peerj.14913)
Supplement: Supplemental Information 4 [file peerj-11-14913-s004.xlsx]

## Sheet: 1 - 副本
Experiment: New Experiment (9) Selected Filter: SYBR Green I / HRM Dye (465-510)
Include	Color	Pos	Name	Cp	Concentration	Standard	Status
TRUE	255	A1	kl t1	18.91		0			kl
TRUE	255	A2	kl t2	16.9		0			nup62
TRUE	65280	A3				0			tm
TRUE	255	A4	kl t3	18.29		0			actin
TRUE	255	A5	kl s1	16.43		0			tbi
TRUE	255	A6	kl s2	20.45		0		kl	18.91	16.9	18.29	18.81
TRUE	255	A7	kl s3	19.36		0		s	15.6	14.5	18.7	17.75
TRUE	255	A8	kl s4	17.71		0		t	16.43	20.45	19.36	17.71
TRUE	255	A9	kl t4	18.81		0		t		15.48	18.57	17.6
TRUE	65280	A10				0
TRUE	65280	A11				0
TRUE	65280	A12				0		nup62	13.81	13.72	18.93	17.9
TRUE	255	B1	kl t1	15.6		0		s	13.95	13.53	17.14	16.65
TRUE	255	B2	kl t2	14.5		0		t	14.8	18.54	17.42	15.77
TRUE	65280	B3				0		t	15.57	17.54	17.92	15.77
TRUE	255	B4	kl t4	17.75		0
TRUE	65280	B5	kl s1			0		tm	15.02	14.47	18.25	18.59
TRUE	255	B6	kl s2	15.48		0		s	15.63	15.95	18.98	18.59
TRUE	255	B7	kl s3	18.57		0		t	16.89	18.77	19.4	17.79
TRUE	255	B8	kl s4	17.6		0		t	16.98	18.88	18.95	17.84
TRUE	255	B9	kl t3	18.7		0
TRUE	65280	B10				0		ac	14.14	13.24	16.31	15.89
TRUE	65280	B11				0		s	17.45	15.97	15.83	16.36
TRUE	65280	B12				0		t	16.89	17.2	18.7	15.35
TRUE	255	C1	nu t1	13.81		0		t	15.41	17.69	17.51	16.73
TRUE	255	C2	nut2	13.72		0
TRUE	65280	C3				0
TRUE	255	C4	nut4	17.9		0
TRUE	255	C5	nus1	14.8		0
TRUE	255	C6	nus2	18.54		0
TRUE	255	C7	nus3	17.42		0
TRUE	255	C8	nus4	15.77		0
TRUE	65280	C9				0
TRUE	65280	C10				0
TRUE	65280	C11				0
TRUE	65280	C12				0
TRUE	255	D1	nut1	13.95		0
TRUE	255	D2	nut2	13.53		0
TRUE	65280	D3				0
TRUE	255	D4	nut4	16.65		0
TRUE	255	D5	nus1	15.57		0
TRUE	255	D6	nus2	17.54		0
TRUE	255	D7	nus3	17.92		0
TRUE	255	D8	nus4	15.77		0
TRUE	255	D9	nut3	18.93		0
TRUE	255	D10	nut3	17.14		0
TRUE	65280	D11				0
TRUE	65280	D12				0
TRUE	255	E1	tmt1	15.02		0
TRUE	255	E2	tmt2	14.47		0
TRUE	65280	E3				0
TRUE	255	E4	tmt4	18.59		0
TRUE	255	E5	tms1	16.89		0
TRUE	255	E6	tms2	18.77		0
TRUE	255	E7	tms3	19.4		0
TRUE	255	E8	tms4	17.79		0
TRUE	65280	E9				0
TRUE	255	E10	tmt3	18.25		0
TRUE	65280	E11				0
TRUE	65280	E12				0
TRUE	255	F1	tmt1	15.63		0
TRUE	255	F2	tmt2	15.95		0
TRUE	65280	F3				0
TRUE	255	F4	tmt4	18.59		0
TRUE	255	F5	tms1	16.98		0
TRUE	255	F6	tms2	18.88		0
TRUE	255	F7	tms3	18.95		0
TRUE	255	F8	tms4	17.84		0
TRUE	65280	F9				0
TRUE	255	F10	tmt3	18.98		0
TRUE	65280	F11				0
TRUE	65280	F12				0
TRUE	255	G1	t1	14.14		0
TRUE	255	G2	t2	13.24		0
TRUE	65280	G3				0
TRUE	255	G4	t4	15.89		0
TRUE	255	G5	s1	15.23		0
TRUE	255	G6	s2	17.2		0
TRUE	255	G7	s3	18.7		0
TRUE	255	G8	s4	15.35		0
TRUE	65280	G9				0
TRUE	255	G10	t3	16.31		0
TRUE	65280	G11				0
TRUE	65280	G12				0
TRUE	255	H1	t1	17.45		0
TRUE	255	H2	t2	15.97		0
TRUE	65280	H3				0
TRUE	255	H4	t4	16.36		0
TRUE	255	H5	s1	15.41		0
TRUE	255	H6	s2	17.69		0
TRUE	255	H7	s3	17.51		0
TRUE	255	H8	s4	16.73		0
TRUE	65280	H9				0
TRUE	255	H10	t3	15.83		0
TRUE	65280	H11				0
TRUE	65280	H12				0
