# Supplementary material for: RNA-seq reveals Nup62 as a potential regulator for cell division after traumatic brain injury in mice hippocampus
Source: PeerJ. 2023 Mar 7;11:e14913. doi: 10.7717/peerj.14913 (PMC10000302; doi:10.7717/peerj.14913)
Supplement: Supplemental Information 5 [file peerj-11-14913-s005.xlsx]

## Sheet: Sheet1
		Sequence (5' -> 3')	Length	Tm	Location
nup62(Mouse)	Forward Primer	GGCACCGGAGGGTTTAATTTT	21	60.9	118-138
	Reverse Primer	GCAGGTGTTGTTCCAAAGTTG	21	60.2	248-228
